# Supplementary material for: BRPF1 bridges H3K4me3 and H3K23ac in human embryonic stem cells and is essential to pluripotency
Source: PubMed Central journal article supplement — iScience. 2023 Jan 5;26(2):105939. doi: 10.1016/j.isci.2023.105939 (PMC9874078; doi:10.1016/j.isci.2023.105939), 2023-01-05
Supplement: mmc1.pdf [file mmc1.pdf]

iScience, Volume 26

## **Supplemental information**

**BRPF1 bridges H3K4me3 and H3K23ac**

**in human embryonic stem cells**

**and is essential to pluripotency**

**Cong Zhang, Huaisong Lin, Yanqi Zhang, Qi Xing, Jingyuan Zhang, Di Zhang, Yancai Liu, Qianyu Chen, Tiancheng Zhou, Junwei Wang, Yongli Shan, and Guangjin Pan**

# Figure S1

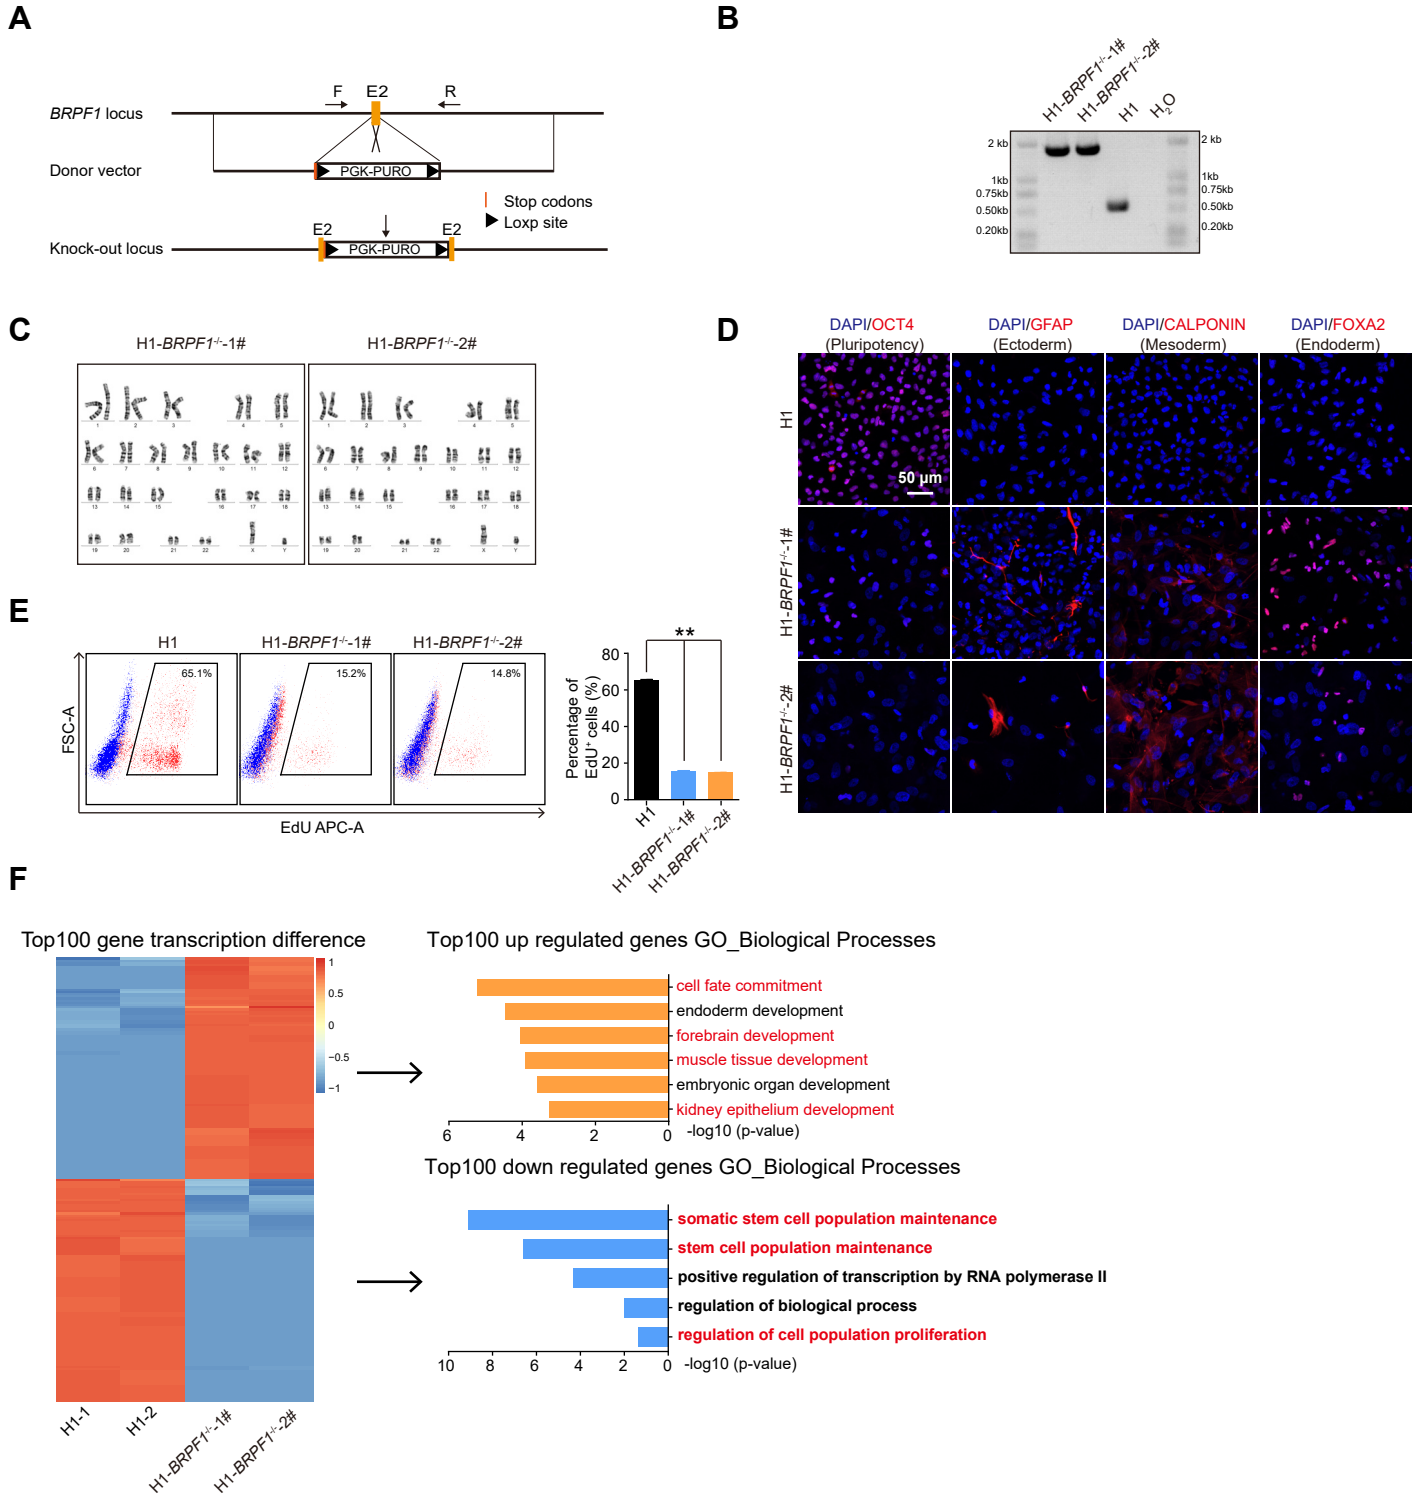

**Figure S1. BRPF1 is an indispensable gene for the pluripotency and self-renewal of hESCs, related to Figure 1.**

(A) Overview of the BRPF1 targeting strategy. sgRNA was designed, and a homologous targeting vector containing a puromycin resistance cassette was constructed according to the BRPF1 gene. (B) PCR identification of WT and two BRPF1<sup>-/-</sup> H1 hESC clones. WT hESCs served as a negative control. (C) Karyotype in BRPF1<sup>-/-</sup> H1 hESCs. (D) Immunostaining of the pluripotency and lineage markers OCT4 (pluripotency), GFAP (ectoderm), CALPONIN (mesoderm), and FOXA2 (endoderm) in WT and two BRPF1<sup>-/-</sup> H1 hESC clones. Scale bar, 50 μm. (E) EdU incorporation assay in WT and two BRPF1<sup>-/-</sup> H1 hESC clones. The significance level was determined by unpaired two-tailed Student's t tests. \*\*, P < 0.01. The data represent the mean ± SD (standard deviation) from three independent repeats (n=3). (F) Heatmap and GO analysis of the top 100 genes up- or down-regulated in two BRPF1<sup>-/-</sup> H1 hESC clones compared with WT H1 hESCs. All error bars throughout the figure represent the SD (standard deviation) from three independent replicates (n = 3).

## Figure S2

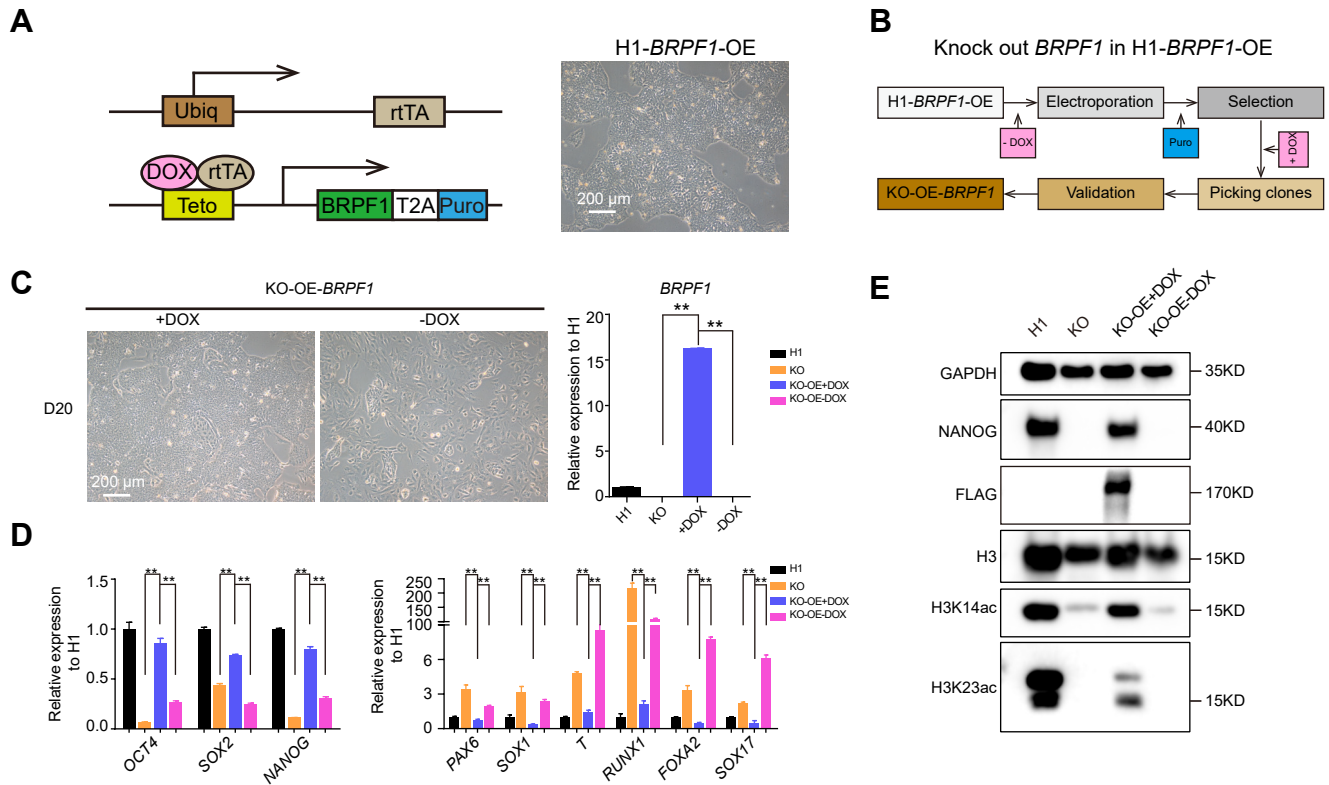

**Figure S2. Inducible expression of BRPF1 complements the *BRPF1*<sup>-/-</sup> hESCs phenotype, related to Figure 2.**

(A) Diagram of the lentiviral-based inducible system for BRPF1 expression (H1-*BRPF1*-OE). BRPF1 expression was controlled by DOX treatment. (B) Schematic of BRPF1 knockout in H1 hESCs with BRPF1 over expression (KO-OE-*BRPF1*). (C) The morphology of *BRPF1*<sup>-/-</sup> H1 hESCs with BRPF1 over-expression (+DOX) or no (-DOX) was shown. Scale bar, 200 μm. The expression of BRPF1 was examined in the indicated cells by qRT-PCR. The significance level was determined by unpaired two-tailed Student's t tests. \*\*,  $P < 0.01$ . The data represent the mean  $\pm$  SD (standard deviation) from three independent repeats ( $n=3$ ). (D) Examination of the expression of the selected pluripotent and lineage genes in the indicated cells by qRT-PCR. The significance level was determined by unpaired two-tailed Student's t tests. \*\*,  $P < 0.01$ . The data represent the mean  $\pm$  SD (standard deviation) from three independent repeats ( $n=3$ ). (E) Western blot of NANOG, BRPF1 (FLAG), H3K14ac or H3K23ac in the indicated cells. All error bars throughout the figure represent the SD (standard deviation) from three independent replicates ( $n = 3$ ).

## Figure S3

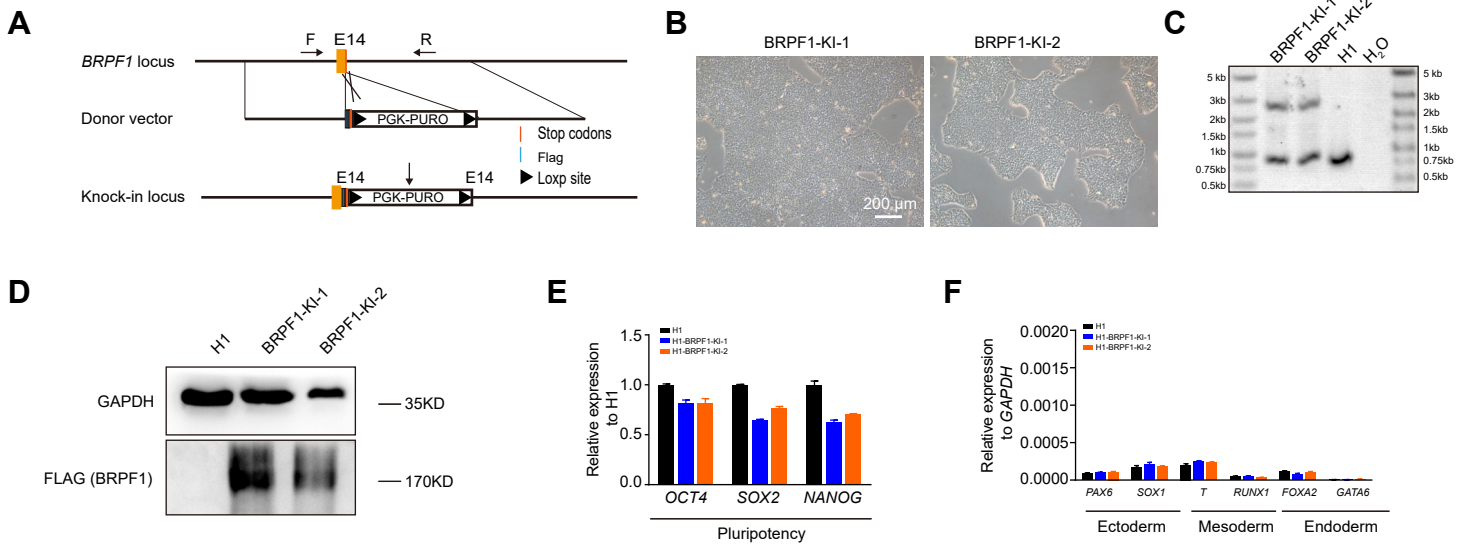

**Figure S3. Knock in triple-FLAG into BRPF1 locus in hESCs, Related to Figure 4.**

(A) Overview of the BRPF1 locus knock-in (KI) triple-FLAG strategy. (B) Morphology of BRPF1-KI H1 hESCs. Scale bar, 200  $\mu$ m. (C) PCR identification in WT and two BRPF1-KI H1 hESC clones. WT hESCs served as a negative control. (D) GAPDH protein and FLAG tag were examined in WT and two BRPF1-KI H1 hESC clones by western blot. (E-F) Examination of the expression of the selected (E) pluripotent and (F) lineage genes in WT and two BRPF1-KI H1 hESC clones.

# Figure S4

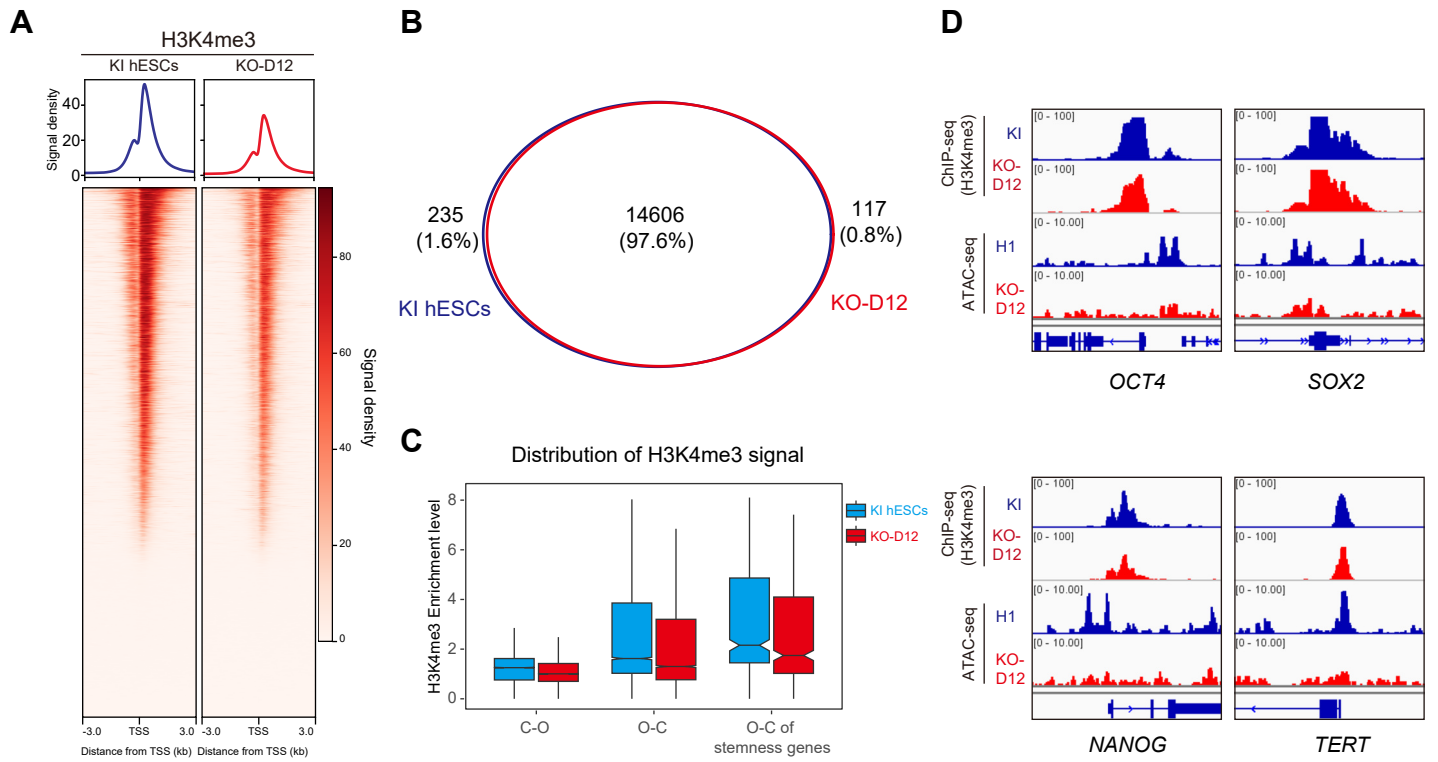

**Figure S4. Similar localization of H3K4me3 between WT and BRPF1<sup>-/-</sup> hESCs, Related to Figure 4.**

(A) Heatmap and signal densities of H3K4me3 associated genes in KI and BRPF1<sup>-/-</sup> hESCs from ChIP-seq. (B) Venn diagram for H3K4me3 associated genes in the indicated cells. (C) Enrichment of H3K4me3 associated with different regions. "C-O" represents regions of close to open; "O-C" represents regions of open to close; "O-C of stemness genes" represents regions of open to close in stemness genes. (D) Genomic views of H3K4me3 enrichment and ATAC-seq analysis in the indicated WT and BRPF1<sup>-/-</sup> hESCs.
